# Supplementary material for: The Mobile Phone Affinity Scale: Enhancement and Refinement
Source: JMIR Mhealth Uhealth. 2016 Dec 15;4(4):e134. doi: 10.2196/mhealth.6705 (PMC5200845; doi:10.2196/mhealth.6705)
Supplement: Multimedia Appendix 1 [file mhealth_v4i4e134_app1.pdf]

# Mobile Phone Affinity Scale (MPAS)

Record ID \_\_\_\_\_

**INSTRUCTIONS:** People use their mobile phone for different things, some are more important than others. Please use the 1-5 scale provided ("Not at all true" to "Extremely true") to rate how TRUE for YOU the following statements are.

**Don't spend too much time on any statement. Answer quickly and honestly.**

|                                                                                                  | Not at all true       | A little true         | Somewhat true         | Very true             | Extremely true        |
|--------------------------------------------------------------------------------------------------|-----------------------|-----------------------|-----------------------|-----------------------|-----------------------|
| My phone helps me keep track of my social life.                                                  | <input type="radio"/> |
| I use my phone to connect with my co-workers or other students.                                  | <input type="radio"/> |
| I would get more work done if I spent less time on my phone.                                     | <input type="radio"/> |
| When it comes to my health or social life, my phone is my personal assistant.                    | <input type="radio"/> |
| I find myself occupied with my phone when I should be doing other things.                        | <input type="radio"/> |
| I feel safe when I have my phone with me.                                                        | <input type="radio"/> |
| I feel dependent on my phone.                                                                    | <input type="radio"/> |
| I feel anxious if I don't have my phone with me.                                                 | <input type="radio"/> |
| I read/send text messages when I am at work or in class that are not related to what I am doing. | <input type="radio"/> |
| I find myself occupied on my phone even when I'm with other people.                              | <input type="radio"/> |
| Having my phone with me makes it easier to leave a risky situation.                              | <input type="radio"/> |
| I rely on my phone 24/7.                                                                         | <input type="radio"/> |
| My mobile phone helps me to stay up-to-date with work/school activities.                         | <input type="radio"/> |
| I feel isolated without my phone.                                                                | <input type="radio"/> |

|                                                                                       |                       |                       |                       |                       |                       |
|---------------------------------------------------------------------------------------|-----------------------|-----------------------|-----------------------|-----------------------|-----------------------|
| I feel in control when I have my phone with me.                                       | <input type="radio"/> |
| My phone is necessary for work/school.                                                | <input type="radio"/> |
| Without my mobile phone I feel out of touch with the world.                           | <input type="radio"/> |
| I am never bored if I have my phone with me.                                          | <input type="radio"/> |
| My phone helps me stay close to my friends and family.                                | <input type="radio"/> |
| My phone makes it easy to cancel plans with others.                                   | <input type="radio"/> |
| I use my phone all day.                                                               | <input type="radio"/> |
| My phone gives me a sense of security.                                                | <input type="radio"/> |
| My phone helps me to be more organized at work/school.                                | <input type="radio"/> |
| I find myself engaged with my mobile phone for longer period of time than I intended. | <input type="radio"/> |
